# Supplementary material for: Magnetospinography visualizes electrophysiological activity in the cervical spinal cord
Source: PubMed Central journal article supplement (PMC5438392; doi:10.1038/s41598-017-02406-8), 2017-05-19

**Supplementary Information:**

**Magneto-spinography visualizes electrophysiological activity in the cervical spinal cord**

Satoshi Sumiya, MD<sup>1</sup>; Shigenori Kawabata, PhD<sup>\*1,2</sup>; Yuko Hoshino, PhD<sup>2</sup>; Yoshiaki Adachi, PhD<sup>3</sup>; Kensuke Sekihara, PhD<sup>2</sup>; Shoji Tomizawa, PhD<sup>1</sup>; Masaki Tomori, PhD<sup>1</sup>; Senichi Ishii, PhD<sup>1</sup>; Kyohei Sakaki, PhD<sup>1</sup>; Dai Ukegawa, PhD<sup>1</sup>; Shuta Ushio, MD<sup>1</sup>; Taishi Watanabe<sup>4</sup>; Atsushi Okawa, PhD<sup>1</sup>

**Supplementary Figure S1.** Schematic illustration of intra-axonal currents (red arrows), volume currents (yellow arrows flowing outside the nerve) and magnetic fields (green arrows) resulting from intra-axonal currents (magnetic fields generated by volume currents are not illustrated here).

**Supplementary Video S2.** Temporal changes in reconstructed currents of a healthy subject measured after stimulation of the lower thoracic spinal cord. A movie corresponding to Figure 2a.

**Supplementary Video S3.** Reconstructed currents of the cervical spondylotic myelopathy patient. A movie corresponding to Figure 4a.

**Supplementary Video S4.** Reconstructed currents after stimulation of the right median nerve at the elbow. A movie corresponding to Figure 6a.

# Supplementary figure 1

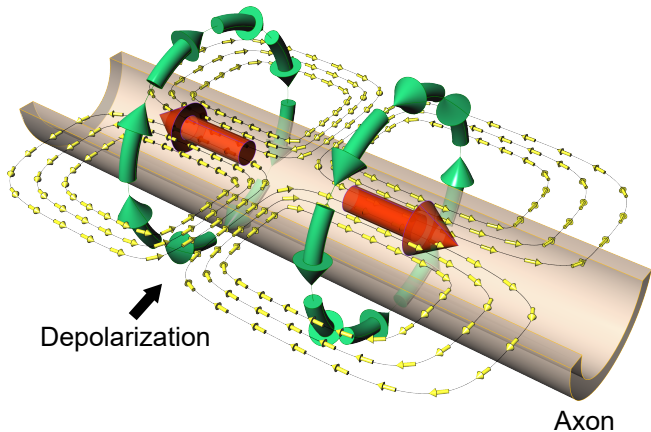

Supplement: 41598_2017_2406_MOESM1_ESM.pdf [file 41598_2017_2406_MOESM1_ESM.pdf]
